# Supplementary material
Source: PubMed Central journal article supplement (PMC11562391)
Supplement: sj-pdf-1-ajl-10.1177_15598276241261646.pdf [file sj-pdf-1-ajl-10.1177_15598276241261646.pdf]

## Supplemental Materials

### Survey Questions

1. Have snacks been provided to you on a previous clinical rotation?
  - a. Yes
  - b. No
  - c. This is my first rotation
2. On average during your Core Surgery Clerkship, how many times did you consume at least one snack during the workday?
  - a. Every day
  - b. Several times a week
  - c. Once a week
  - d. Once or twice a month
  - e. Once or twice during the clerkship
  - f. Never
3. On average during your Core Surgery Clerkship, how many times did you consume lunch during the workday?
  - a. Every day
  - b. Several times a week
  - c. Once a week
  - d. Once or twice a month
  - e. Once or twice during the clerkship
  - f. Never
4. On average, how many times did you access the healthy snacks locker? (*post-initiative survey only*)
  - a. Several times a week
  - b. Once a week
  - c. Once or twice a month
  - d. Once or twice during the clerkship
  - e. Never
5. How important to you is access to healthy snacks on rotations?
  - a. Very important
  - b. Somewhat important
  - c. Neither important nor unimportant
  - d. Somewhat unimportant
  - e. Very unimportant
6. On average, how often did you eat **only** food from the healthy snacks locker on the Surgery Clerkship? (*post-initiative survey only*)
  - a. Every day of the week
  - b. Three to four times a week
  - c. One to two times a week
  - d. Once or twice a month
  - e. Once or twice during the clerkship
  - f. I never only ate food from the healthy snacks closet on any given day during my rotation

7. Do you think access to healthy snacks on the rotation would improve student wellness?
  - a. Definitely improve wellness
  - b. Somewhat improve wellness
  - c. No impact on wellness
  - d. Somewhat worsen wellness
  - e. Definitely worsen wellness
8. Would you recommend the healthy snacks locker to future Surgery Clerkship students?  
*(post-initiative survey only)*
  - a. Definitely recommend
  - b. Maybe recommend
  - c. No recommendation
  - d. Would not recommend
9. Do you feel that clerkship faculty are supportive of the Nutritional Wellness Initiative?  
*(post-initiative survey only)*
  - a. Very supportive
  - b. Somewhat supportive
  - c. Neither supportive nor unsupportive
  - d. Somewhat unsupportive
  - e. Very unsupportive
10. Are clerkship faculty supportive of you making or taking time to get snacks provided by the Nutritional Wellness Initiative? *(post-initiative survey only)*
  - a. Very supportive
  - b. Somewhat supportive
  - c. Neither supportive nor unsupportive
  - d. Somewhat unsupportive
  - e. Very unsupportive
11. Are clerkship faculty supportive of you making or taking time to get food from the hospital cafeteria or other locations within the hospital?
  - a. Very supportive
  - b. Somewhat supportive
  - c. Neither supportive nor unsupportive
  - d. Somewhat unsupportive
  - e. Very unsupportive
12. Any additional comments? Suggestions for specific healthy snacks to include/omit in future iterations of the program are also appreciated.
  - a. (Free text entry)

**Snacks Offered**

---

Apples  
Oranges  
Bananas  
Greek yogurt  
Prepackaged popcorn  
Trail mix snack packs  
Popped-corn chips  
Granola bars with chocolate  
Veggie straws  
Gummy fruit snacks  
Cheez-Its  
Pringles  
Goldfish  
Protein bars  
Beef jerky

**Table S1.** List of snacks provided for students.
